# Supplementary material for: Analyzing bacterial community in pit mud of Yibin Baijiu in China using high throughput sequencing
Source: PeerJ. 2020 May 12;8:e9122. doi: 10.7717/peerj.9122 (PMC7227652; doi:10.7717/peerj.9122)
Supplement: Data S1 [file peerj-08-9122-s008.xlsx]

## Sheet: Raw Data for Table 1
	Sample Name	Group	moisture content	pH	ammonia nitrogen	available phosphorous	humics acid
	JN-01D1	Sub	0.41	3.9	32.361	159.915	2.482‰
	JN-01D2	Sub	0.3298	3.85	92.165	318.104	4.278‰
	JN-01D3	Sub	0.4245	4.18	55.292	178.473	4.001‰
	JN-01Z1	Middle	0.4579	4.18	61.237	93.243	3.189‰
	JN-01Z2	Middle	0.4092	4.51	61.045	133.818	2.674‰
	JN-02D2	Sub	0.3838	4.71	48.795	66.408	3.301‰
	JN-02D3	Sub	0.4322	4.66	51.648	319.236	2.449‰
	JN-02Z1	Middle	0.3856	6.15	44.697	253.337	2.205‰
	JN-02Z2	Middle	0.413	5.86	50.214	228.066	2.079‰
	JN-02Z3	Middle	0.3805	6.22	59.646	449.488	3.037‰
	JN-04D1	Sub	0.4567	3.87	55.908	133.711	2.733‰
	JN-04D3	Sub	0.3583	4.24	31.217	152.765	3.644‰
	JN-04Z1	Middle	0.4286	4.33	51.748	119.417	2.674‰
	JN-04Z2	Middle	0.407	5.28	53.474	23.708	2.416‰
	JN-04Z3	Middle	0.386	6.91	38.262	38.226	3.070‰
	JN-05D1	Sub	0.5837	4.38	87.94	19.483	3.373‰
	JN-05D2	Sub	0.6444	5.76	111.885	22.497	3.446‰
	JN-05Z1	Middle	0.587	7.34	70.514	16.671	3.670‰
	JN-05Z2	Middle	0.595	7.51	91.103	29.663	4.674‰
	JN-06D2	Sub	0.3193	4.02	20.137	8.482	1.056‰
	JN-06S2	Middle	0.3178	4.93	99.134	131.744	1.697‰
	JN-06Z1	Middle	0.344	4.56	16.391	12.736	1.340‰
	JN-06Z2	Middle	0.2638	4.88	9.16	6.588	1.967‰
	JN-08D1	Sub	0.241	4.68	17.567	8.103	1.360‰
	JN-08D2	Sub	0.323	3.99	59.521	2.409	1.182‰
	JN-08D3	Sub	0.326	4.48	28.97	1.825	1.307‰
	JN-08Z1	Middle	0.239	4.66	32.017	4.027	1.881‰
	JN-08Z2	Middle	0.364	4.74	47.96	17.272	1.697‰
	JN-08Z3	Middle	0.302	5.82	78.292	7.708	1.565‰
	JN-09D1	Sub	0.362	4.07	39.946	60.658	3.103‰
	JN-09D2	Sub	0.281	4.48	47.513	24.687	4.159‰
	JN-09D3	Sub	0.3172	4.29	42.657	54.065	2.515‰
	JN-09Z1	Middle	0.3679	7.69	57.417	227.23	2.363‰
	JN-09Z2	Middle	0.3455	7.88	73.792	223.139	2.889‰
	JN-09Z3	Middle	0.3632	7.6	80.531	287.312	2.489‰
	JN-10D1	Sub	0.3724	7.67	66.388	345.231	3.222‰
	JN-10D2	Sub	0.4426	4.47	20.282	159.132	5.228‰
	JN-10Z1	Middle	0.2464	4.27	38.32	65.281	9.599‰
	JN-10Z2	Middle	0.4058	6.69	29.064	329.512	1.789‰
	JN-10Z3	Middle	0.3064	8.48	25.064	192.054	1.822‰
	JN-11D1	Sub	0.432	7.05	75.661	163.881	2.489‰
	JN-11D3	Sub	0.4665	5.86	77.659	326.523	3.736‰
	JN-11Z1	Middle	0.4178	3.77	69.886	6.537	3.862‰
	JN-11Z2	Middle	0.417	3.65	60.721	28.886	3.981‰
	JN-11Z3	Middle	0.4334	5.46	90.931	190.743	3.149‰
	JN-12D1	Sub	0.3756	5.74	58.042	21.091	3.333‰
	JN-12D2	Sub	0.3827	3.85	34.271	26.872	3.413‰
	JN-12Z1	Middle	0.2854	7.17	44.765	27.03	3.083‰
	JN-12Z2	Middle	0.3755	8.78	44.556	26.149	3.809‰
	JN-15D2	Sub	0.4133	5.07	66.877	29.577	8.265‰
	JN-15D3	Sub	0.4218	4.61	65.066	24.722	3.142‰
	JN-15Z1	Middle	0.3678	6.18	82.586	14.737	4.793‰
	JN-15Z2	Middle	0.342	6.33	40.974	28.147	6.324‰
	JN-15Z3	Middle	0.3686	6.86	95.479	16.956	6.984‰
	JN-16D1	Sub	0.321	4.07	30.053	13.809	2.370‰
	JN-16D2	Sub	0.3839	4.45	51.59	13.603	2.258‰
	JN-16D3	Sub	0.4157	4.24	46.33	19.161	1.881‰
	JN-16D4	Sub	0.3496	7.38	51.078	7.707	3.756‰
	JN-16Z1	Middle	0.3437	4.05	45.021	5.948	3.895‰
	JN-16Z2	Middle	0.414	5.06	57.004	15.753	1.941‰
	JN-16Z3	Middle	0.4472	4.12	38.677	15.161	2.099‰
	JN-16Z4	Middle	0.3703	7.3	66.701	3.004	1.954‰
	JN-17D1	Sub	0.3565	3.54	85.181	42.406	3.090‰
	JN-17D2	Sub	0.4308	3.82	77.027	26.924	2.416‰
	JN-17D3	Sub	0.4312	3.97	50.003	48.216	3.010‰
	JN-17Z1	Middle	0.396	7.76	112.974	154.662	2.495‰
	JN-17Z2	Middle	0.4006	7.5	87.061	340.058	3.525‰
	JN-17Z3	Middle	0.395	7.79	58.407	178.177	1.875‰
